# Supplementary material
Source: Springer Nature journal article supplement (https://www.springermedizin.de/resource/supplementary/12943_2010_813_MOESM5_ESM.pdf/9554890)

**A (i)** pHIV1SDm-CMV-GFP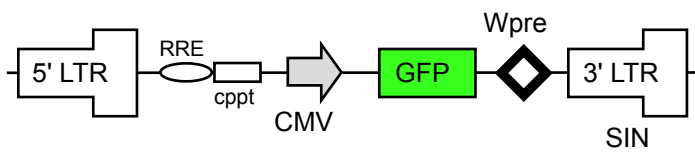**(ii)** pHIV1SDm-CMV-GFP-P2A-luc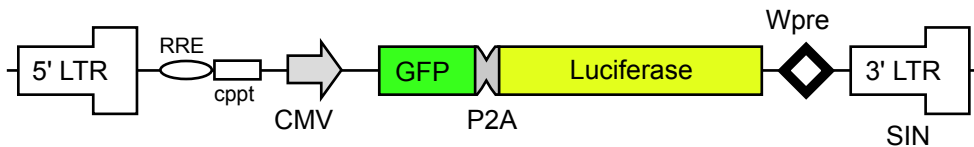**B**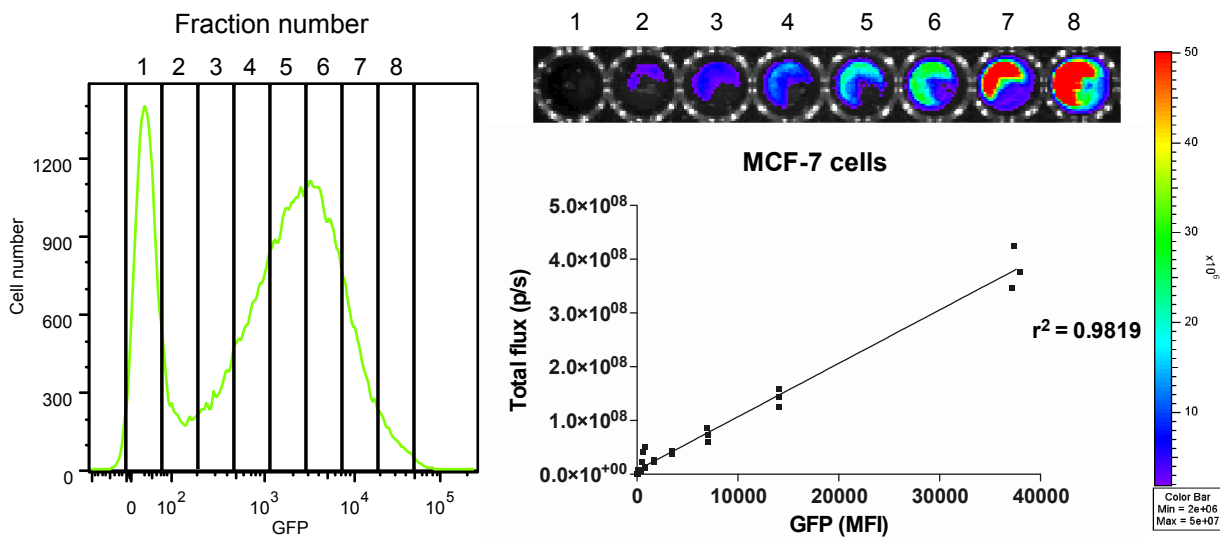**C**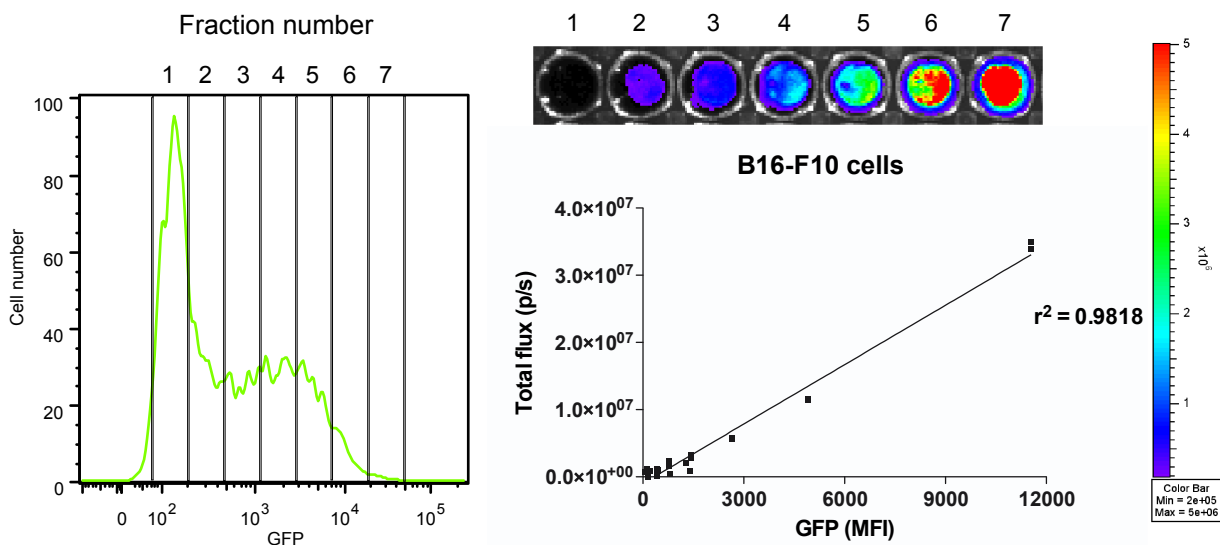

Supplement: MOESM5 [file 9554890]
